# Supplementary material for: Self-assembled tubular nanostructures of tris(8-quinolinolato)gallium(iii)
Source: Royal Society of Chemistry journal article supplement (doi:10.1039/c5ra14452c), 2015-01-01
Supplement: c5ra14452c1.pdf [file c5ra14452c1.pdf]

## Supporting information

### Self-assembled tubular nanostructures of tris(8-quinolinolato)gallium(III)

Wanfeng Xie,<sup>a</sup> Fenggong Wang,<sup>c</sup> Jihui Fan,<sup>a</sup> Hui Song,<sup>a</sup> Zongyong Wu,<sup>a</sup> Huimin Yuan,<sup>a</sup> Feng Jiang,<sup>a</sup> Zhiyong Pang,<sup>\*a</sup> and Shenghao Han<sup>\*a,b</sup>

<sup>a</sup>School of Physics, State Key Laboratory of Crystal Materials, Shandong University, Jinan 250100, P. R. China.

<sup>b</sup>School of Space Science and Physics, Shandong University, Weihai 264209, P. R. China

<sup>c</sup>Materials Science and Engineering Department, University of Maryland, College Park, Maryland 20910, United States.

Corresponding author: [hansh@sdu.edu.cn](mailto:hansh@sdu.edu.cn); [pang@sdu.edu.cn](mailto:pang@sdu.edu.cn)

Tel & Fax: +86 531 88365435

**Supplemental figures:**

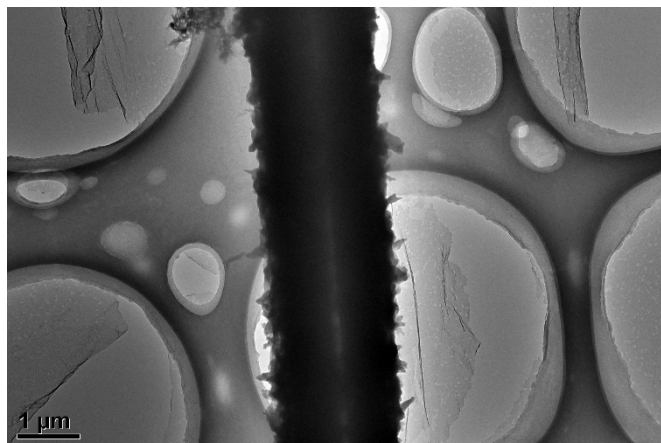

**Fig. S1** TEM image of Gaq<sub>3</sub> sub-microtubes.

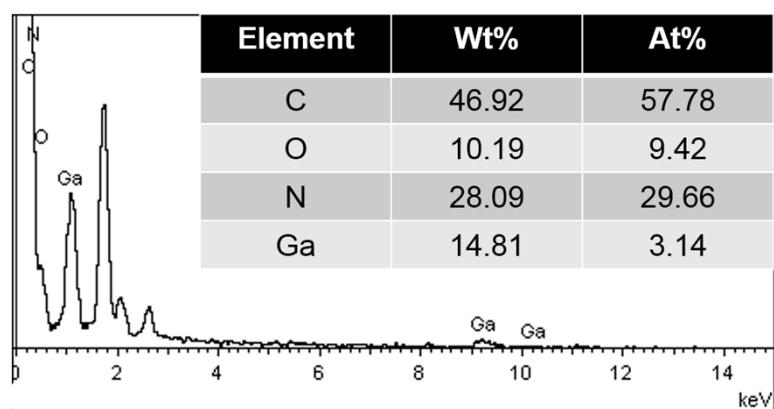

**Fig. S2** The energy-dispersive spectroscopy (EDS) analysis of Gaq<sub>3</sub> tubes, and the inset table is the element contents of Gaq<sub>3</sub> sub-microtubes.

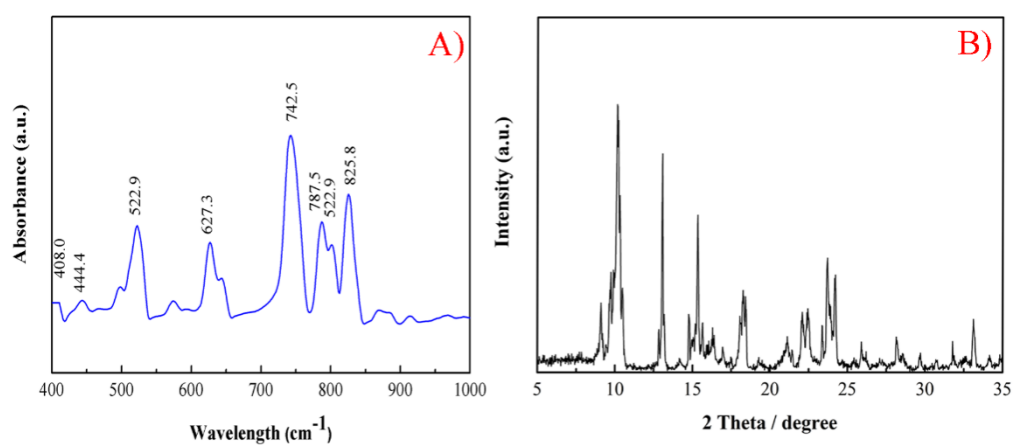

**Fig. S3** (A) Fourier transform infrared spectroscopy (FTIR) spectrum and (B) powder X-ray diffraction (XRD) pattern of Gaq<sub>3</sub> sub-microtubes.

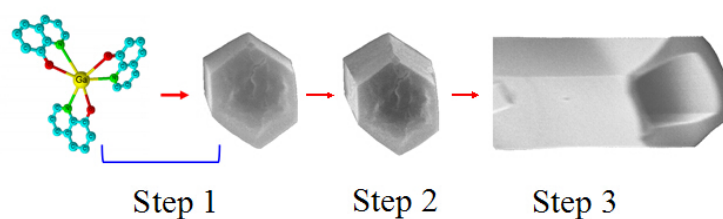

**Captions:**

Step 1: formation of crystal seeds and aggregation to the regularly hexagonal pad

Step 2: pad growth accompanying by the etching or dissolution at its center

Step 3: gradual formation of  $\text{Gaq}_3$  tubes

**Fig. S4** Schematic representation for the formation growth process of the  $\text{Gaq}_3$  sub-microtubes.

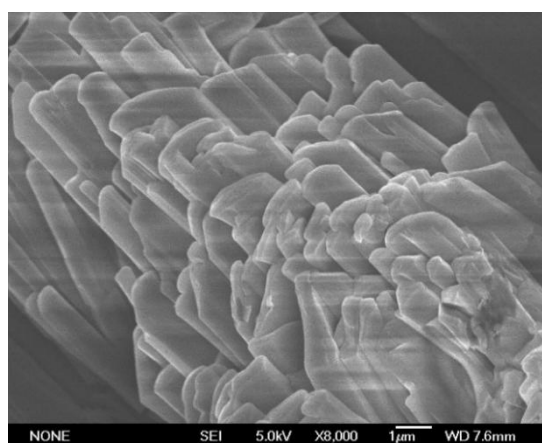

**Fig. S5** The SEM image of  $\text{Gaq}_3$  irregular solid structures fabricated at 328K.

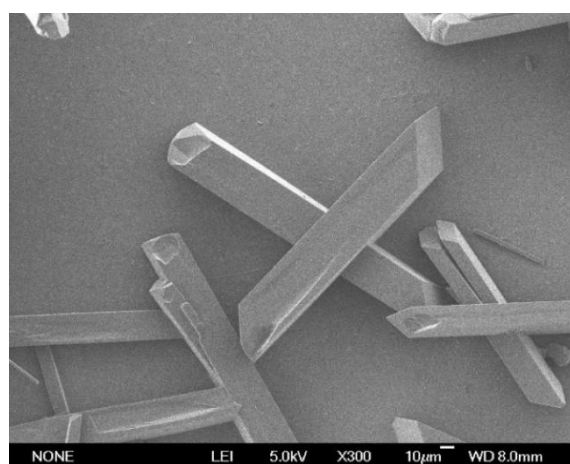

**Fig S6** The SEM image of grown  $\text{Gaq}_3$  structures when the concentration of  $\text{Gaq}_3$  solution is 45

mg/ml.

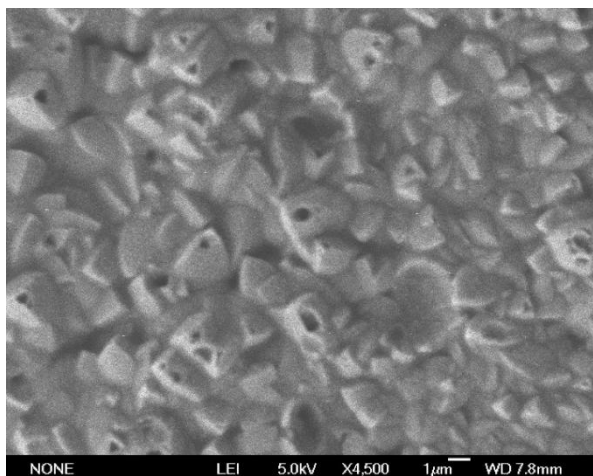

**Fig. S7** The SEM image of grown  $\text{Gaq}_3$  structures when the concentration of  $\text{Gaq}_3$  solution is 10 mg/ml.

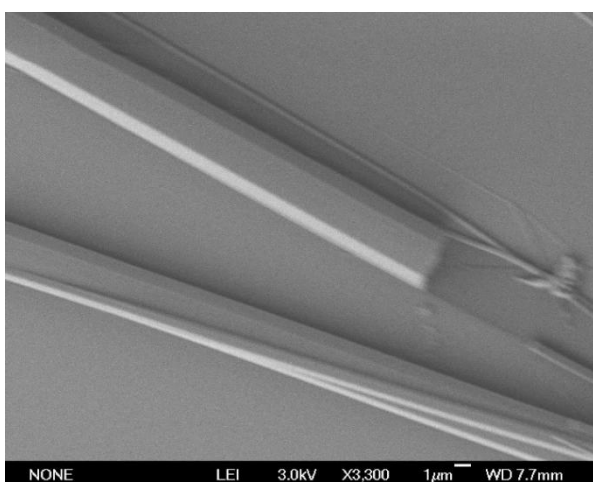

**Fig. S8** The SEM image of grown  $\text{Gaq}_3$  rods rather than tubes are made in the absence of ethanol when the concentration of  $\text{Gaq}_3$  solution is 36 mg/ml.
